# Supplementary material
Source: HighWire-hosted journal article supplement (https://bmjopen.bmj.com/content/11/12/e047393)
Supplement: inline-supplementary-material-1 [file inline-supplementary-material-1.pdf]

Changes in students' PHQ9 scores

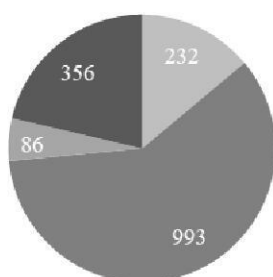

- Clinical change from no depression at Time 1 to depression at Time 2
- Stable, no depression at Time 1 and 2
- Clinical change from depression at Time 1 to none at Time 2
- Stable, depression at Time 1 and 2
